# Supplementary material for: The Fasciola hepatica genome: gene duplication and polymorphism reveals adaptation to the host environment and the capacity for rapid evolution
Source: PubMed Central journal article supplement (PMC4404566; doi:10.1186/s13059-015-0632-2), 2015-04-03
Supplement: 13059_2015_632_MOESM4_ESM.pdf [file 13059_2015_632_MOESM4_ESM.pdf]

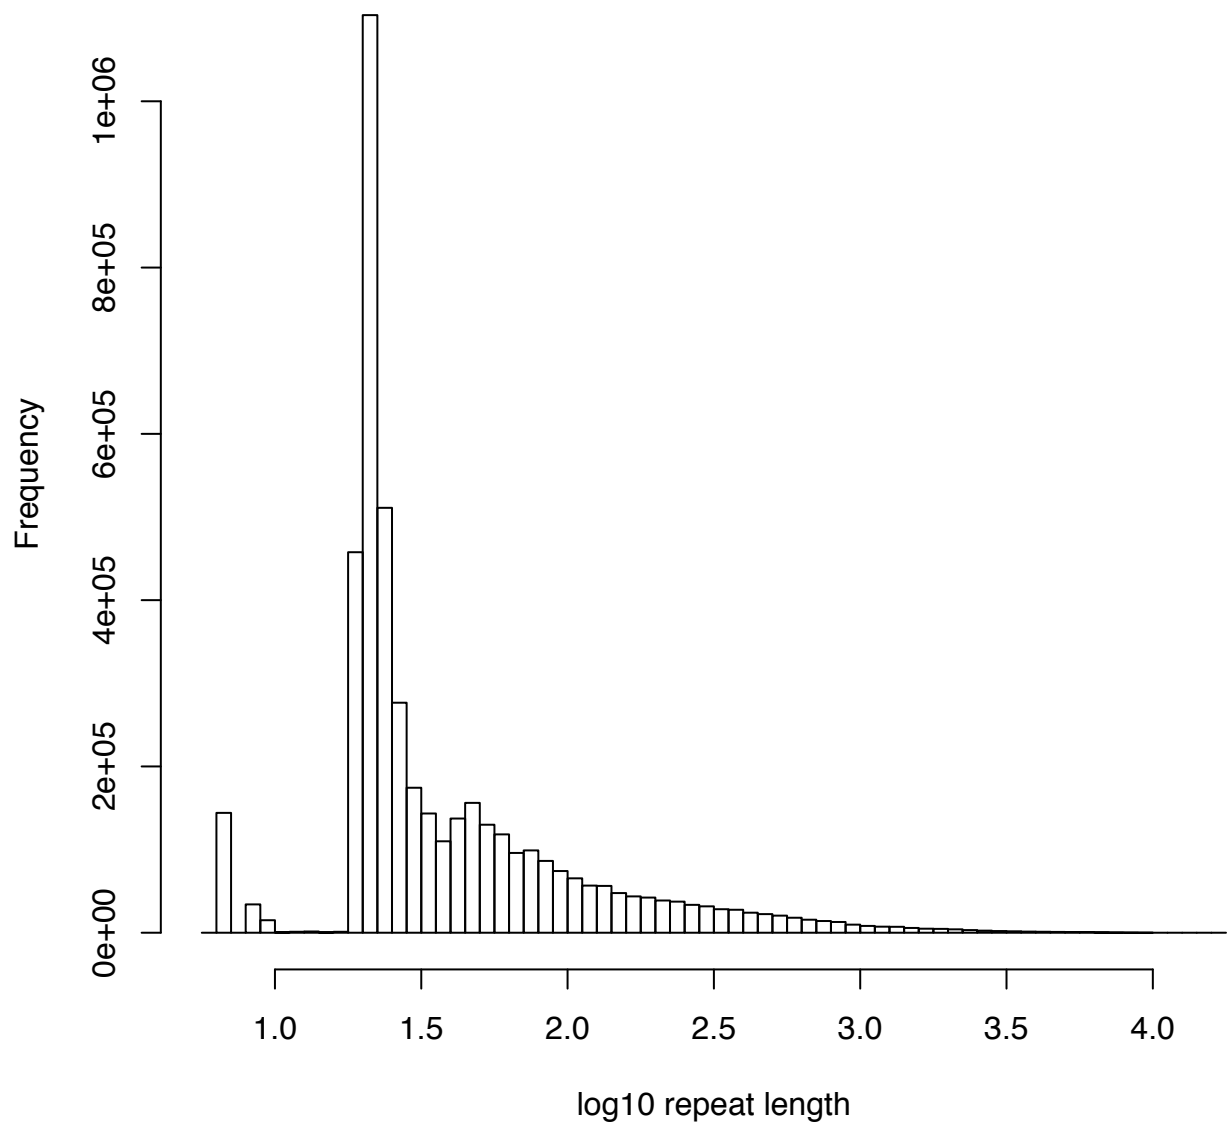

**Figure S2.** Distribution of repeat length within the *Fasciola hepatica* genome.
